# Supplementary material for: Baveno-VII criteria to predict decompensation and initiate non-selective beta-blocker in compensated advanced chronic liver disease patients
Source: PubMed Central journal article supplement — Clin Mol Hepatol. 2022 Sep 5;29(1):135–45. doi: 10.3350/cmh.2022.0181 (PMC9845679; doi:10.3350/cmh.2022.0181), 2022-09-05
Supplement: cmh-2022-0181-Supplementary-Fig-1.pdf [file cmh-2022-0181-Supplementary-Fig-1.pdf]

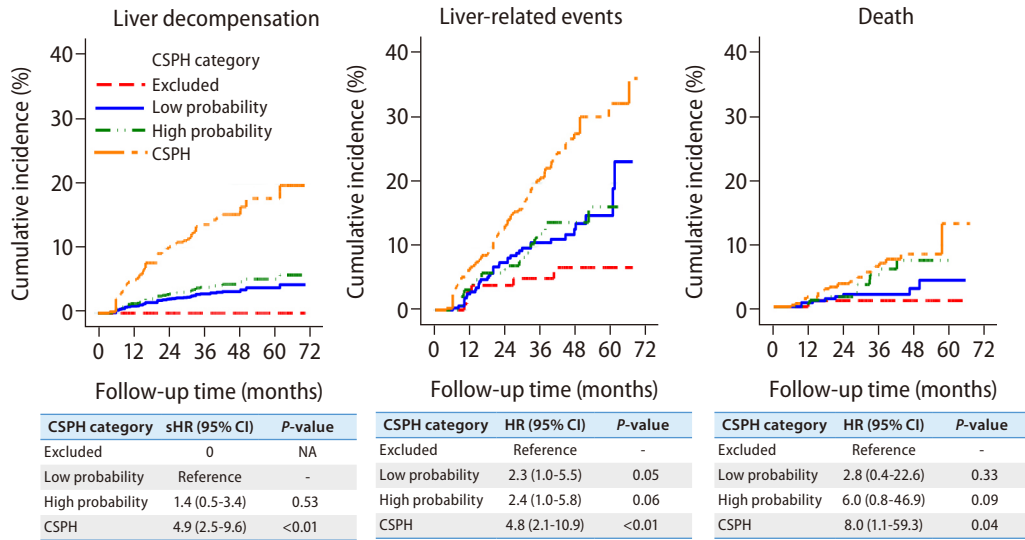

**Supplementary Figure 1.** Cumulative incidence of clinical outcomes (liver decompensation, liver-related events and death) for compensated advanced chronic liver disease patients without high-risk varices. Liver decompensation was defined as the presence of ascites, variceal bleeding and hepatic encephalopathy. Liver-related events was defined as the presence of liver decompensation, hepatocellular carcinoma or death. CSPH, clinically significant portal hypertension; sHR, subdistribution hazard ratio; CI, confidence interval; NA, not applicable.
