# Supplementary material for: Baveno-VII criteria to predict decompensation and initiate non-selective beta-blocker in compensated advanced chronic liver disease patients
Source: PubMed Central journal article supplement — Clin Mol Hepatol. 2022 Sep 5;29(1):135–45. doi: 10.3350/cmh.2022.0181 (PMC9845679; doi:10.3350/cmh.2022.0181), 2022-09-05
Supplement: cmh-2022-0181-Supplementary-Table-1.pdf [file cmh-2022-0181-Supplementary-Table-1.pdf]

**Supplementary Table 1.** Baseline characteristics of study cohort based on study sites

| Variable                              | India (n=278) | Italy (n=386) | Singapore (n=262) | China (n=233) |
|---------------------------------------|---------------|---------------|-------------------|---------------|
| Age (years)                           | 48±13         | 64±12         | 55±10             | 50±12         |
| Gender, male                          | 201 (72.3)    | 222 (57.5)    | 214 (81.7)        | 139 (60.0)    |
| Ethnicity                             |               |               |                   |               |
| Caucasian                             | 0 (0.0)       | 356 (92.2)    | 1 (0.4)           | 0 (0.0)       |
| Chinese                               | 0 (0.0)       | 0 (0.0)       | 95 (36.3)         | 233 (100.0)   |
| Indian                                | 278 (100.0)   | 0 (0.0)       | 32 (12.2)         | 0 (0.0)       |
| Malay                                 | 0 (0.0)       | 0 (0.0)       | 111 (42.4)        | 0 (0.0)       |
| Arabic                                | 0 (0.0)       | 28 (7.3)      | 0 (0.0)           | 0 (0.0)       |
| Others                                | 0 (0.0)       | 2 (0.5)       | 23 (8.8)          | 0 (0.0)       |
| Etiology                              |               |               |                   |               |
| Hepatitis B                           | 73 (26.3)     | 0 (0.0)       | 32 (12.2)         | 142 (60.9)    |
| Hepatitis C                           | 46 (16.6)     | 386 (100.0)   | 175 (66.8)        | 43 (18.5)     |
| Alcohol                               | 90 (32.4)     | 0 (0.0)       | 4 (1.5)           | 11 (4.7)      |
| NASH                                  | 69 (24.8)     | 0 (0.0)       | 32 (12.2)         | 1 (0.4)       |
| Others                                | 0 (0.0)       | 0 (0.0)       | 19 (7.3)          | 36 (15.5)     |
| MELD score                            | 9±3           | 8±2           | 8±3               | 8±3           |
| Child-Turcott-Pugh score              | 5.4±0.7       | 5.1±0.2       | 5.2±0.6           | 5.3±0.7       |
| LSM (kPa)                             | 29.3±10.8     | 20.0±9.0      | 23.7±14.0         | 23.5±3.8      |
| Fibrosis-4                            | 4.3±2.9       | 5.3±3.7       | 3.5±3.4           | 4.3±4.1       |
| Laboratory parameters                 |               |               |                   |               |
| Albumin (g/L)                         | 36±5          | 42±4          | 41±5              | 42±5          |
| Bilirubin (µmol/L)                    | 24±12         | 15±9          | 18±20             | 22±16         |
| ALT (µmol/L)                          | 48±26         | 100±78        | 71±40             | 79±74         |
| Platelets (×10 <sup>3</sup> /µL)      | 130±66        | 141±67        | 164±67            | 129±57        |
| Platelet count (×10 <sup>3</sup> /µL) |               |               |                   |               |
| <150                                  | 183 (65.8)    | 241 (62.4)    | 125 (47.7)        | 159 (68.2)    |
| ≥150                                  | 95 (34.2)     | 145 (37.6)    | 137 (52.3)        | 74 (31.8)     |
| INR                                   | 1.16±0.14     | 1.07±0.10     | 1.06±0.14         | 1.09±0.14     |
| Creatinine (µmol/L)                   | 66 (53–80)    | 69 (60–80)    | 79 (67–95)        | 60 (49–67)    |
| Esophageal varices                    |               |               |                   |               |
| No varices                            | 127 (45.7)    | 197 (69.6)    | 194 (74.0)        | 123 (52.8)    |
| Low-risk varices                      | 151 (54.3)    | 79 (27.9)     | 48 (18.3)         | 79 (33.9)     |
| High-risk varices                     | 0 (0.0)       | 7 (2.5)       | 20 (7.6)          | 31 (13.3)     |
| Follow-up time (months)               | 33 (26–40)    | 52 (39–56)    | 43 (32–54)        | 38 (30–43)    |

Values are presented as mean±standard deviation, median (interquartile range), or frequency (%).

CSPH, clinically significant portal hypertension; MELD, Model of End-stage Liver Disease; LSM, liver stiffness measurement; ALT, alanine aminotransferase; INR, international normalized ratio.
