# Supplementary material for: Baveno-VII criteria to predict decompensation and initiate non-selective beta-blocker in compensated advanced chronic liver disease patients
Source: PubMed Central journal article supplement — Clin Mol Hepatol. 2022 Sep 5;29(1):135–45. doi: 10.3350/cmh.2022.0181 (PMC9845679; doi:10.3350/cmh.2022.0181), 2022-09-05
Supplement: cmh-2022-0181-Supplementary-Table-2.pdf [file cmh-2022-0181-Supplementary-Table-2.pdf]

**Supplementary Table 2.** Liver-related events based on study sites

| Liver-related event    | Total (n=1,159) | India (n=278) | Italy (n=386) | Singapore (n = 262) | China (n=233) |
|------------------------|-----------------|---------------|---------------|---------------------|---------------|
| Liver decompensation   | 83 (7.2)        | 48 (17.3)     | 3 (0.8)       | 10 (3.8)            | 22 (9.4)      |
| Ascites                | 73 (6.3)        | 45 (16.2)     | 2 (0.5)       | 6 (2.3)             | 20 (8.6)      |
| Variceal bleeding      | 15 (1.3)        | 7 (2.5)       | 1 (0.3)       | 4 (1.5)             | 3 (1.3)       |
| Hepatic encephalopathy | 15 (1.3)        | 11 (4.0)      | 0 (0.0)       | 1 (0.4)             | 3 (1.3)       |
| HCC                    | 67 (5.8)        | 23 (8.3)      | 23 (6.0)      | 18 (6.9)            | 3 (1.3)       |
| Death                  | 51 (4.4)        | 17 (6.1)      | 15 (3.9)      | 18 (6.9)            | 1 (0.4)       |

Values are presented as number (%).

HCC, hepatocellular carcinoma.
