# Supplementary material for: Baveno-VII criteria to predict decompensation and initiate non-selective beta-blocker in compensated advanced chronic liver disease patients
Source: PubMed Central journal article supplement — Clin Mol Hepatol. 2022 Sep 5;29(1):135–45. doi: 10.3350/cmh.2022.0181 (PMC9845679; doi:10.3350/cmh.2022.0181), 2022-09-05
Supplement: cmh-2022-0181-Supplementary-Table-3.pdf [file cmh-2022-0181-Supplementary-Table-3.pdf]

**Supplementary Table 3.** The risk of liver decompensation, liver-related events and death according to the non-invasive diagnosis of clinically significant portal hypertension in cACLD patients with clustering effect

| CSPH category    | Liver decompensation |                 | Liver-related event |                 | All-cause death |                 |
|------------------|----------------------|-----------------|---------------------|-----------------|-----------------|-----------------|
|                  | sHR (95% CI)         | <i>P</i> -value | HR (95% CI)         | <i>P</i> -value | HR (95% CI)     | <i>P</i> -value |
| CSPH excluded    | 0                    | NA              | Reference           | -               | Reference       | -               |
| Low probability  | Reference            | -               | 2.2 (0.9–4.8)       | 0.06            | 2.0 (0.4–8.9)   | 0.38            |
| High probability | 1.3 (0.9–1.8)        | 0.06            | 1.8 (0.8–4.4)       | 0.16            | 3.2 (0.7–14.9)  | 0.14            |
| CSPH             | 5.5 (4.0–7.4)        | <0.01           | 3.9 (1.8–8.4)       | <0.01           | 4.6 (1.1–19.6)  | 0.04            |

cACLD, compensated advanced chronic liver disease; CSPH, clinically significant portal hypertension; sHR, subdistribution hazard ratio; CI, confidence interval; NA, not applicable.
