# Supplementary material for: Baveno-VII criteria to predict decompensation and initiate non-selective beta-blocker in compensated advanced chronic liver disease patients
Source: PubMed Central journal article supplement — Clin Mol Hepatol. 2022 Sep 5;29(1):135–45. doi: 10.3350/cmh.2022.0181 (PMC9845679; doi:10.3350/cmh.2022.0181), 2022-09-05
Supplement: cmh-2022-0181-Supplementary-Table-4.pdf [file cmh-2022-0181-Supplementary-Table-4.pdf]

**Supplementary Table 4.** Predictors of liver decompensation in cACLD patients from proportional subdistribution hazards regression

| Variable                        | Multivariable         | P-value |
|---------------------------------|-----------------------|---------|
|                                 | Adjusted sHR (95% CI) |         |
| LSM $\geq$ 25 (CSPH)            | 2.48 (1.35–4.55)      | 0.003   |
| Non-viral etiology of cirrhosis | 3.25 (1.83–5.76)      | <0.001  |
| INR >1.1                        | 2.08 (1.14–3.80)      | 0.017   |
| Albumin <37                     | 3.38 (1.83–6.25)      | <0.001  |

Non-viral etiologies of cirrhosis included nonalcoholic steatohepatitis, alcohol, autoimmune and cryptogenic cirrhosis.  
cACLD, compensated advanced chronic liver disease; sHR, subdistribution hazard ratio; CI, confidence interval; LSM, liver stiffness measurement; CSPH, clinically significant portal hypertension; INR, international normalized ratio.
