# Supplementary material for: Baveno-VII criteria to predict decompensation and initiate non-selective beta-blocker in compensated advanced chronic liver disease patients
Source: PubMed Central journal article supplement — Clin Mol Hepatol. 2022 Sep 5;29(1):135–45. doi: 10.3350/cmh.2022.0181 (PMC9845679; doi:10.3350/cmh.2022.0181), 2022-09-05
Supplement: cmh-2022-0181-Supplementary-Table-5.pdf [file cmh-2022-0181-Supplementary-Table-5.pdf]

**Supplementary Table 5.** Rule-of-5 in predicting liver decompensation in cACLD patients

| LSM (kPa) | sHR (95% CI)   | P-value |
|-----------|----------------|---------|
| 10 to <15 | Reference      | -       |
| 15 to <20 | 0.5 (0.1–2.1)  | 0.31    |
| 20 to <25 | 3.2 (0.7–14.0) | 0.12    |
| ≥25       | 8.8 (2.9–26.7) | <0.01   |

cACLD, compensated advanced chronic liver disease; LSM, liver stiffness measurement; sHR, subdistribution hazard ratio; CI, confidence interval.
