# Supplementary material for: Baveno-VII criteria to predict decompensation and initiate non-selective beta-blocker in compensated advanced chronic liver disease patients
Source: PubMed Central journal article supplement — Clin Mol Hepatol. 2022 Sep 5;29(1):135–45. doi: 10.3350/cmh.2022.0181 (PMC9845679; doi:10.3350/cmh.2022.0181), 2022-09-05
Supplement: cmh-2022-0181-Supplementary-Table-6.pdf [file cmh-2022-0181-Supplementary-Table-6.pdf]

**Supplementary Table 6.** Predictors of liver decompensation in cACLD patients (grey zone) from proportional subdistribution hazards regression

| Predictor                       | Adjusted sHR (95% CI) | P-value |
|---------------------------------|-----------------------|---------|
| Non-viral etiology of cirrhosis | 11.34 (8.10–15.87)    | <0.001  |
| INR                             | 4.27 (1.33–13.70)     | 0.015   |
| Albumin                         | 0.88 (0.85–0.91)      | <0.001  |
| Bilirubin                       | 1.02 (1.00–1.03)      | 0.015   |

Non-viral etiologies of cirrhosis included non-alcoholic steatohepatitis, alcohol, autoimmune and cryptogenic cirrhosis. cACLD, compensated advanced chronic liver disease; sHR, subdistribution hazard ratio; CI, confidence interval; INR, international normalized ratio.
