# Supplementary material for: Baveno-VII criteria to predict decompensation and initiate non-selective beta-blocker in compensated advanced chronic liver disease patients
Source: PubMed Central journal article supplement — Clin Mol Hepatol. 2022 Sep 5;29(1):135–45. doi: 10.3350/cmh.2022.0181 (PMC9845679; doi:10.3350/cmh.2022.0181), 2022-09-05
Supplement: cmh-2022-0181-Supplementary-Table-7.pdf [file cmh-2022-0181-Supplementary-Table-7.pdf]

**Supplementary Table 7.** Decision curve analysis and number needed to treat/harm in comparison to treating only patients with high-risk varices

| Treatment threshold | Number needed to treat/harm* |                              |                                  |
|---------------------|------------------------------|------------------------------|----------------------------------|
|                     | Definite CSPH strategy       | Probable CSPH-based strategy | Treat all varices-based strategy |
| 5%                  | 27                           | -139                         | 38                               |
| 10%                 | 50                           | -66                          | 115                              |

CSPH, clinically significant portal hypertension.

\*Number needed to treat/ harm are defined with respect to the endoscopy-based strategy of treating only patients with high-risk varices. The negative number needed to treat indicates the number needed to harm.
